# Supplementary material for: Exploring healthcare professionals’ knowledge, attitudes and experiences of shared decision making in rheumatology
Source: PubMed Central journal article supplement — RMD Open. 2020 Jan 7;6(1):e001121. doi: 10.1136/rmdopen-2019-001121 (PMC7046943; doi:10.1136/rmdopen-2019-001121), 2020-01-07
Supplement: rmdopen-2019-001121supp001.pdf [file rmdopen-2019-001121supp001.pdf]

## Appendices

### Appendix 1. Survey

#### Screen 1

- What is your age?
- What is your sex?
  - Male
  - Female
- What is your current profession (licensed or in training)?
  - Rheumatologist
  - Physician assistant
  - Nurse specialist
  - Rheumatology nurse
  - Other, namely:
- How many years do you work in your current profession?
- What is your work setting (multiple answers are possible)?
  - Academic hospital
  - Teaching hospital
  - General hospital
  - Other, namely:

#### Screen 2

- How much do you know about shared decision making? Please score your knowledge on a scale from 0 (=no knowledge) to 10 (=comprehensive knowledge)?

#### Screen 3

- Shared decision making is a process in which healthcare professionals and patients work together to make decisions. How do you define shared decision making?

#### Screen 4

- In your opinion, are the following communicative behaviors essential for shared decision making or not? Please tick the box if you consider a communicative behavior essential for shared decision making.
  - Informing the patient about the possible pros and cons of the treatment options
  - Informing the patient how big the chances of these pros and cons are

- Informing the patient that a decision has to be made
- Allowing the patient time by making the decision in the next consultation
- Asking the patient about his/her personal values and preferences
- Letting the patient decide after giving thorough information
- Asking the patient to bring someone to the consultation
- Explaining to the patient that there is more than one treatment option
- Explaining to the patient why a certain treatment is chosen
- Making the decision together with the patient
- Explaining to the patient that his/her opinion is important in making the decision
- Letting the patient repeat the given information
- Giving information in more ways than only verbally (e.g. leaflets, websites)

**Screen 5**

- How do you feel about applying shared decision making in clinical practice?
  - Very positive
  - Positive
  - Neutral
  - Negative
  - Very negative
- Could you please motivate your answer to the above question?

**Screen 6**

- Which types of rheumatic diseases do you consider appropriate for shared decision making (multiple answers are possible)?
  - Rheumatoid arthritis
  - Psoriatic arthritis
  - Ankylosing spondylitis
  - Monoarthritis
  - Polymyalgia rheumatica
  - Scleroderma
  - Gout
  - Osteoarthritis
  - Osteoporosis

- Fibromyalgia
- Other, namely
- Which types of decisions do you consider appropriate for shared decision making (multiple answers are possible)?
  - Diagnostic testing
  - Starting and/or stopping medication
  - Adjusting medication doses
  - Administering single medication doses
  - Operation
  - Paramedical treatment (e.g. physical therapy, occupational therapy, and dietetics)
  - Making lifestyle changes (e.g. diet, physical activity, and smoking)
  - Other, namely:
- Could you please motivate your answers to the above questions?

**Screen 7**

- What is your usual decision making style?
  - I make decisions alone
  - I make decisions after seriously considering my patient's opinion
  - My patient and I share responsibility for making decisions
  - My patient makes decisions after seriously considering my opinion
  - My patient makes decisions alone

**Screen 8**

- In what percentage of the situations appropriate for shared decision making do you apply shared decision making?
  - 0%
  - 25%
  - 50%
  - 75%
  - 100%

**Screen 9**

- If you do not always apply shared decision making, please tick up to three reasons for not applying shared decision making.
  - Not applicable (i.e. I always apply shared decision making)
  - Shared decision making is often too complex for patients
  - Patients want me to make the decision
  - I often know better than patients what the best decision is
  - Shared decision making is not professional
  - I do not know exactly how to apply shared decision making
  - I do not have enough time to apply shared decision making
  - Shared decision making is incompatible with standardized treatment protocols
  - I forget to apply shared decision making
  - My colleagues do not have a positive attitude toward shared decision making
  - My employer does not support shared decision making
  - Other, namely:

**Screen 10**

- Do you have problems with the application of shared decision making?
  - Not applicable (i.e. I never apply shared decision making)
  - No
  - Yes, namely:

**Screen 11**

- What do you need in order to improve the application of shared decision making in clinical practice?

**Appendix 2. Overview of communicative behaviors predefined as essential for SDM, not essential for SDM, and conflicting with SDM**

| <b>Communicative behaviors essential for SDM</b>                                   |
|------------------------------------------------------------------------------------|
| Informing the patient that a decision has to be made                               |
| Explaining to the patient that there is more than one treatment option             |
| Informing the patient about the possible pros and cons of the treatment options    |
| Informing the patient how big the chances of these pros and cons are               |
| Explaining to the patient that his/her opinion is important in making the decision |
| Asking the patient about his/her personal values and preferences                   |
| Making the decision together with the patient                                      |
| <b>Communicative behaviors not essential for SDM</b>                               |
| Asking the patient to bring someone to the consultation                            |
| Allowing the patient time by making the decision in the next consultation          |
| Giving information in more ways than only verbally (e.g. leaflets, websites)       |
| Letting the patient repeat the given information                                   |
| <b>Communicative behaviors conflicting with SDM</b>                                |
| Explaining to the patient why a certain treatment is chosen                        |
| Letting the patient decide after giving thorough information                       |

Abbreviations: SDM, shared decision making.

### Appendix 3. Examples of participants' definitions of SDM that were rated as concordant, discordant, and inconclusive

| Participants' definitions                                                                                                                                                                                                                                                                                                                                                                                                                                                                                                               | Ratings (reasons for ratings)                                                                                                                                                                                                                                                                                                                                                                                                                                                                                                                                                                                                                                        |
|-----------------------------------------------------------------------------------------------------------------------------------------------------------------------------------------------------------------------------------------------------------------------------------------------------------------------------------------------------------------------------------------------------------------------------------------------------------------------------------------------------------------------------------------|----------------------------------------------------------------------------------------------------------------------------------------------------------------------------------------------------------------------------------------------------------------------------------------------------------------------------------------------------------------------------------------------------------------------------------------------------------------------------------------------------------------------------------------------------------------------------------------------------------------------------------------------------------------------|
| <p><i>"After discussing the possible treatment options and their associated pros and cons, making an appropriate decision together WITH the patient, considering his/her needs, wishes, and motivations."</i> (rheumatologist, man, 38 years old)</p> <p><i>"Exploring what the patient's treatment expectations are, but also what is important to him/her in life on a daily basis. Discussing possible treatment options and, from this, making a decision together with the patient."</i> (rheumatologist, woman, 40 years old)</p> | <p>Concordant (refers to at least two communicative behaviors essential for SDM: "Explaining to the patient that there is more than one treatment option", "Informing the patient about the possible pros and cons of the treatment options", "Asking the patient about his/her personal values and preferences", and "Making the decision together with the patient").</p> <p>Concordant (refers to at least two communicative behaviors essential for SDM: "Explaining to the patient that there is more than one treatment option", "Asking the patient about his/her personal values and preferences", and "Making the decision together with the patient").</p> |
| <p><i>"Individualized treatment arrived at by the physician and the patient."</i> (rheumatologist, man, 50 years old)</p> <p><i>"SDM means that the patient is able to have input, but that the physician decides how to manage treatment."</i> (rheumatology nurse, woman, 62 years old)</p>                                                                                                                                                                                                                                           | <p>Discordant (does not refer to any communicative behavior essential for SDM).</p> <p>Discordant (refers to communicative behavior conflicting with SDM: "Explaining to the patient why a certain treatment is chosen").</p>                                                                                                                                                                                                                                                                                                                                                                                                                                        |
| <p><i>"Making treatment decisions together."</i> (rheumatologist, man, 46 years old)</p> <p><i>"As much as possible, select the best treatment available based on sound reasoning."</i> (nurse specialist, man, 56 years old)</p>                                                                                                                                                                                                                                                                                                       | <p>Inconclusive (too short).</p> <p>Inconclusive (too ambiguous).</p>                                                                                                                                                                                                                                                                                                                                                                                                                                                                                                                                                                                                |

Abbreviations: SDM, shared decision making.

#### Appendix 4. Participants' answers to questions about their attitudes and experiences of SDM in rheumatology

| Questions                                                                          | Physicians (n=77) | Nurses (n=70) | P-value |
|------------------------------------------------------------------------------------|-------------------|---------------|---------|
| How do you feel about applying SDM in clinical practice?*, n (%)                   |                   |               |         |
| <i>(Very) negative</i>                                                             | 0 (0)             | 0 (0)         | 0.04    |
| <i>Neutral</i>                                                                     | 6 (8)             | 0 (0)         |         |
| <i>Positive</i>                                                                    | 44 (57)           | 39 (56)       |         |
| <i>Very positive</i>                                                               | 27 (35)           | 31 (44)       |         |
| What is your usual decision making style?, n (%)                                   |                   |               |         |
| <i>I make decisions alone</i>                                                      | 0                 | 0             | 0.05    |
| <i>I make decisions after seriously considering my patient's opinion</i>           | 9 (12)            | 3 (4)         |         |
| <i>My patient and I share responsibility for making decisions</i>                  | 60 (78)           | 51 (73)       |         |
| <i>My patient makes decisions after seriously considering my opinion</i>           | 8 (10)            | 16 (23)       |         |
| <i>My patient makes decisions alone</i>                                            | 0                 | 0             |         |
| In what percentage of the situations appropriate for SDM do you apply SDM?*, n (%) |                   |               |         |
| 0%                                                                                 | 0 (0)             | 0 (0)         | <0.01   |
| 25%                                                                                | 0 (0)             | 2 (3)         |         |
| 50%                                                                                | 15 (19)           | 7 (10)        |         |
| 75%                                                                                | 52 (68)           | 39 (56)       |         |
| 100%                                                                               | 10 (13)           | 22 (31)       |         |

\*Significant difference between physicians and nurses ( $p < 0.05$ ).

Abbreviations: SDM, shared decision making.
